# Supplementary material
Source: PubMed Central journal article supplement (PMC7101628)
Supplement: 41385_2018_97_MOESM1_ESM.pdf [file 41385_2018_97_MOESM1_ESM.pdf]

Supplementary Table E1: Description of samples used for RNA-sequencing

| <b>ID</b> | <b>Ethnicity</b> | <b>Age<br/>(Y)</b> | <b>sex</b> |
|-----------|------------------|--------------------|------------|
| 4384      | white/hisp       | 22                 | M          |
| 5090      | white/nhisp      | 45                 | M          |
| 2396      | white/nhisp      | 40                 | F          |
| 4019      | white/nhisp      | 52                 | F          |

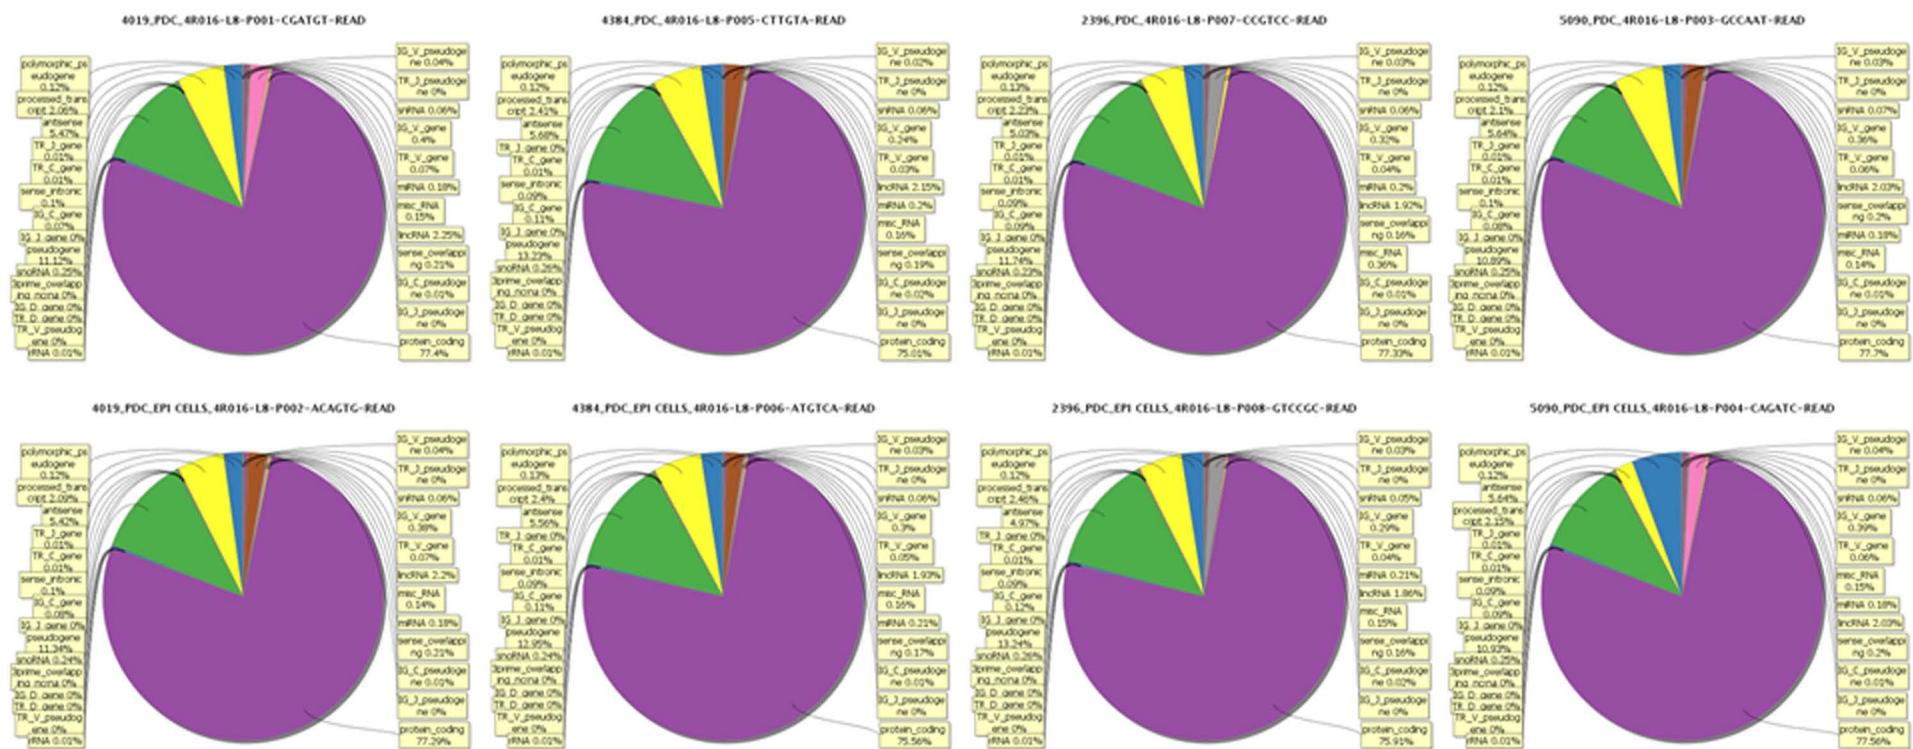

**Supplementary fig. 1:** Pie charts displaying the distribution of aligned reads mapping to different gene types. Reads aligning completely or partially within any gene boundaries are used. We used Ensembl gene annotation for alignment and the gene typed are specific to this specific annotation.

Supplementary fig. 2

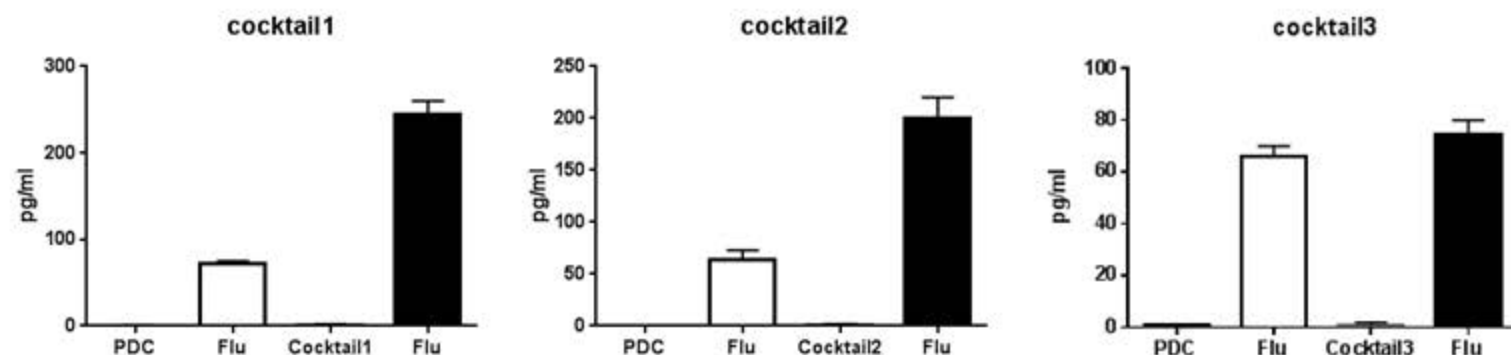

PDCs were stimulated with influenza in the presence or absence of the cocktails. Bar graph represent the IFN- $\alpha$  levels in the supernatants. Data is mean  $\pm$  S.E. of 2 expts.

Cocktail 1:(GMCSF, VEGF, GCSF, IL-6, IL-8, CCL-2)

Cocktail 2:(GMCSF, VEGF and GCSF)

Cocktail 3: (IL-6, IL-8, CCL-2)
